# Supplementary material for: A multi-responsive biomimetic nano-complex platform for enhanced gene delivery
Source: Royal Society of Chemistry journal article supplement (doi:10.1039/c8tb02038h), 2018-01-01
Supplement: c8tb02038h1.pdf [file c8tb02038h1.pdf]

## Supplementary material

Multi-responsive biomimetic nano-complex platform for enhanced gene  
delivery

Xiaoyu Bai<sup>a</sup>, Ming Kong<sup>a\*</sup>, Xuanjin Wu<sup>a</sup>, Xiguang Chen<sup>a,b\*</sup>

a: College of Marine Life Science, Ocean University of China, Qingdao,  
266003, P.R. China

b: Qingdao National Laboratory for Marine Science and Technology,  
Qingdao, 266000, P.R. China

\*Corresponding authors: Dr. Ming Kong, kongming@ouc.edu.cn and Prof.  
Xiguang Chen, E-mail: xgchen@ouc.edu.cn

College of Marine Life Science  
Ocean University of China  
5# Yushan Road, Qingdao, 266003, China  
Tel/Fax.: 86-0532-82032586

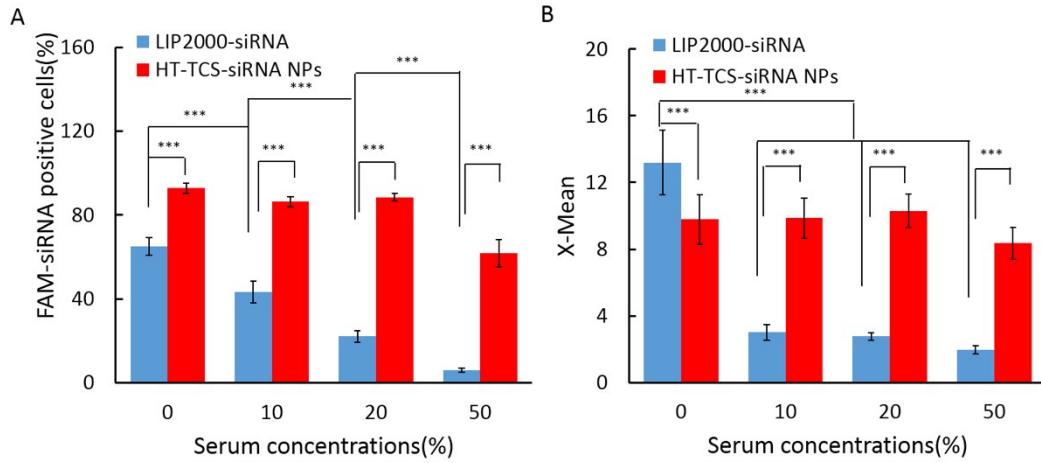

Figure S1. Flow cytometric analysis of HeLa cells after treated with LIP2000-siRNA and HT-TCS-FAM-siRNA NPs in the presence of varying serum concentrations: 0, 10, 20, and 50 vol% for 4 h. Quantification of (A) FAM-siRNA positive cells and (B) intracellular fluorescence intensity(n=3). The final concentration of siRNA is 60 nM. \*\*\*p < 0.001, \*\*p < 0.01, \*P < 0.05.
